# Supplementary material
Source: PubMed Central journal article supplement (PMC8522145)
Supplement: 12911_2021_1646_MOESM2_ESM.pdf [file 12911_2021_1646_MOESM2_ESM.pdf]

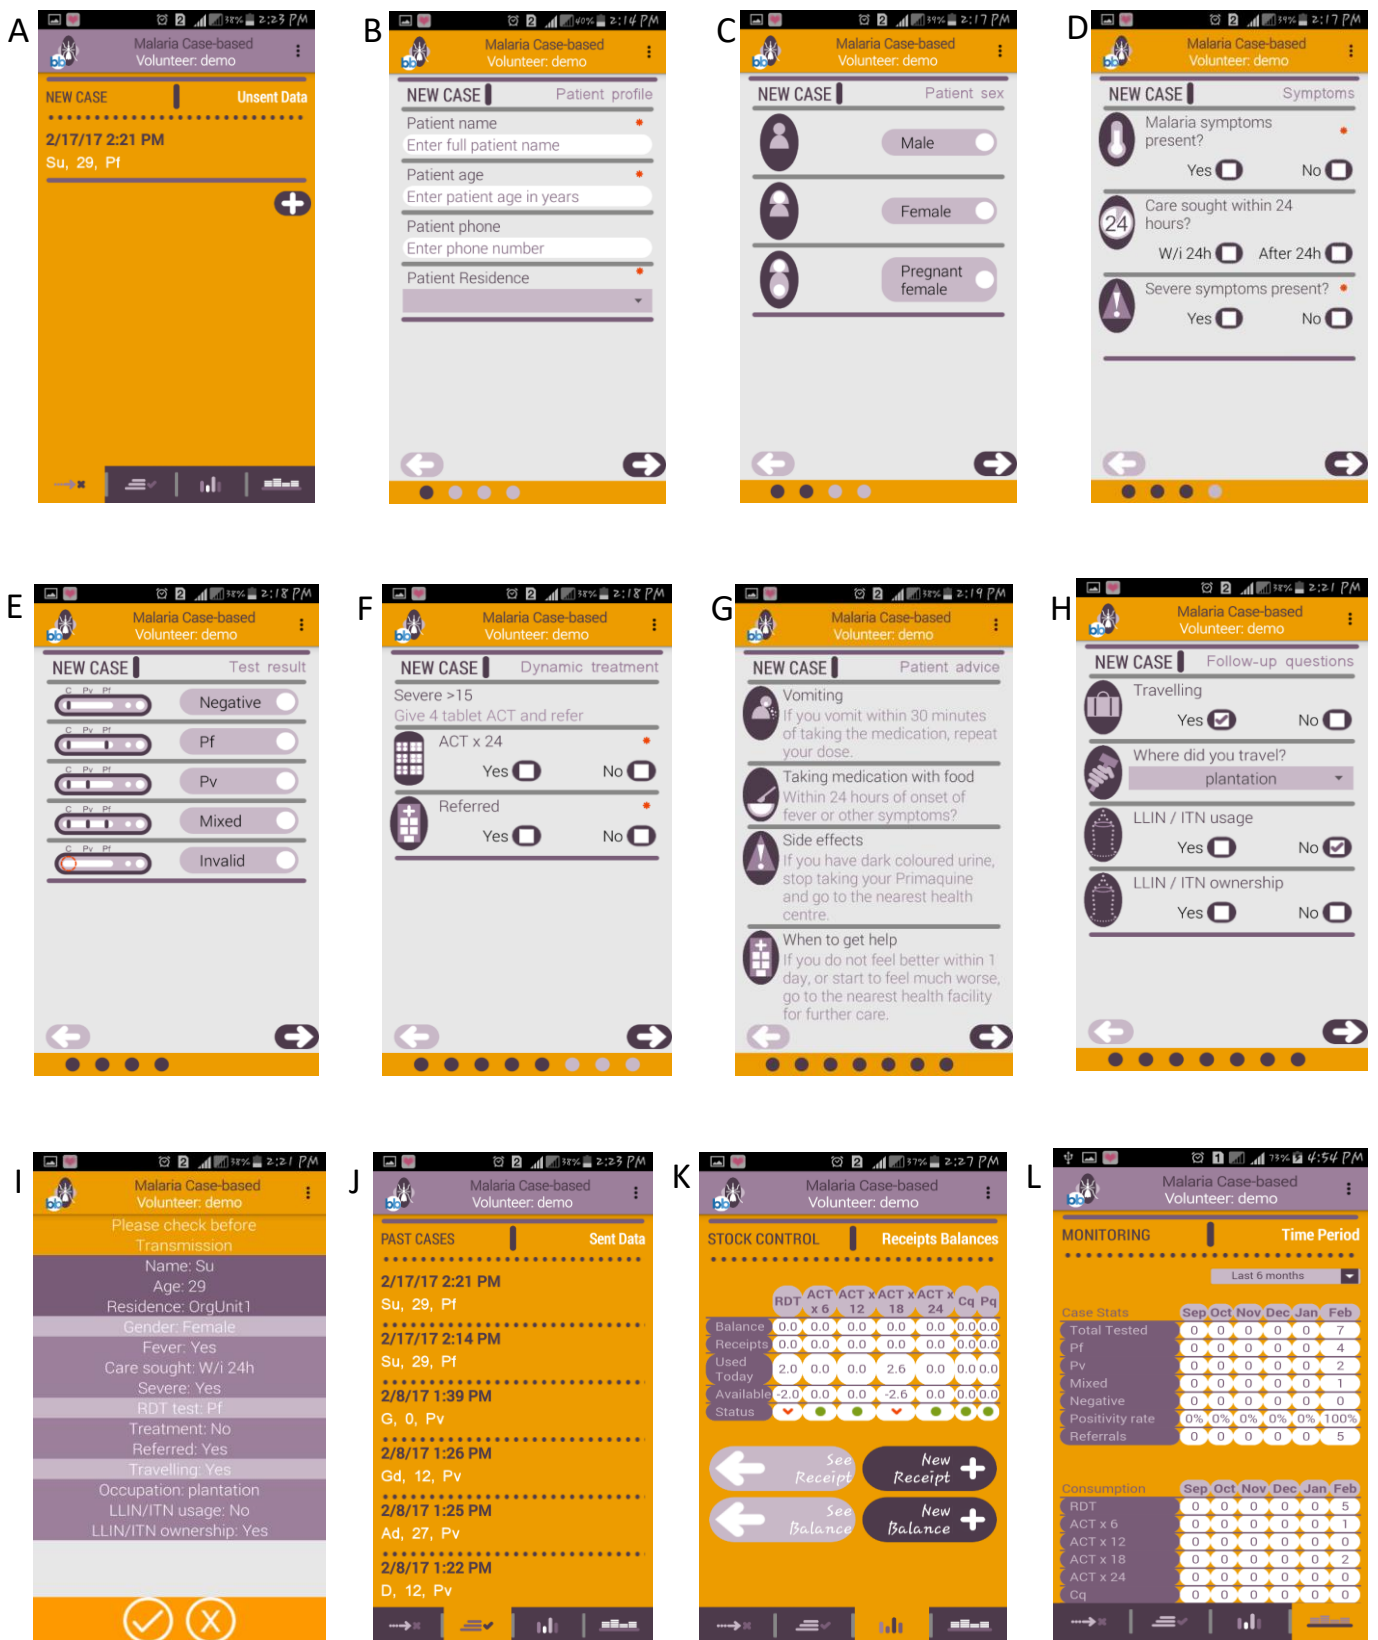

**Figure 1 (A-L).** Screenshots of Malaria Case-based Reporting (MCBR) mobile application. This figure was published in Win Han Oo, et al. A mobile phone application for malaria case-based reporting to advance malaria surveillance in Myanmar: a mixed methods evaluation. *Malaria Journal*. 2021;20(1): 167. and is used with permission of Win Han Oo, et al.
